# Supplementary material for: Reactions of trinuclear platinum clusters with electrophiles: ionisation isomerism with [Pt3(μ2-I)(μ-PPh2)2(PPh3)3]I and [Pt3(μ-PPh2)2I2(PPh3)3]. Structures of [Pt3(μ2-Cl)(μ-PPh2)2(PPh3)3]PF6, [Pt3(μ-PPh2)2I2(PPh3)3] and of the Pt–Ag cluster [Pt3{μ3-AgBF4}(μ2-I)(μ-PPh2)2(PPh3)3]BF4
Source: Royal Society of Chemistry journal article supplement (doi:10.1039/c4dt00090k), 2014-01-01
Supplement: c4dt00090k1.pdf [file c4dt00090k1.pdf]

## Supplementary Material

**Reactions of Trinuclear Platinum Clusters with Electrophiles: An Example of Ionisation Isomerism with  $[\text{Pt}_3(\mu\text{-I})(\mu\text{-PPh}_2)_2(\text{PPh}_3)_3]\text{I}$  and  $[\text{Pt}_3(\mu\text{-PPh}_2)_2\text{I}_2(\text{PPh}_3)_3]$ . Molecular Structures of  $[\text{Pt}_3(\mu\text{-Cl})(\mu\text{-PPh}_2)_2(\text{PPh}_3)_3]\text{PF}_6$ ,  $[\text{Pt}_3(\mu\text{-PPh}_2)_2\text{I}_2(\text{PPh}_3)_3]\cdot\text{C}_6\text{H}_5\text{Cl}$  and of the Mixed-Metal Pt-Ag Cluster  $[\text{Pt}_3\{\mu_3\text{-AgBF}_4\}(\mu\text{-I})(\mu\text{-PPh}_2)_2(\text{PPh}_3)_3]\text{BF}_4$ .**†

Christine Archambault,<sup>a</sup> Robert Bender,<sup>a</sup> Pierre Braunstein,<sup>\*,a</sup> Yves Dusausoy<sup>b</sup> and Richard Welter.<sup>c</sup>

<sup>a</sup> *Laboratoire de Chimie de Coordination (UMR 7177 CNRS), Institut de Chimie, Université de Strasbourg, 4 rue Blaise Pascal, F-67081 Strasbourg-Cédex, France, Fax: + 33 368851308. E-mail: braunstein@unistra.fr*

<sup>b</sup> *Laboratoire de Cristallographie et Modélisation des Matériaux Minéraux et Biologiques, UPRESA 7036, Université Henri Poincaré, Nancy I, Faculté des Sciences, Boîte postale 239, F-54206 Vandoeuvre-les-Nancy, France.*

<sup>c</sup> *Laboratoire DECOMET, Institut de Chimie (UMR 7177 CNRS), Université de Strasbourg, 4 rue Blaise Pascal, F-67081 Strasbourg-Cedex, France.*

---

**Table S-1.** Summary of Crystal Data and Intensity Collection of  $[\text{Pt}_3(\mu_2\text{-Cl})(\mu\text{-PPh}_2)_2(\text{PPh}_3)_3]\text{PF}_6$  (**4**(PF<sub>6</sub>))

**Table S-2.** Table of least-squares planes in  $[\text{Pt}_3(\mu_2\text{-Cl})(\mu\text{-PPh}_2)_2(\text{PPh}_3)_3]\text{PF}_6$  (**4**(PF<sub>6</sub>))

**Table S-3.** Summary of Crystal Data and Intensity Collection of  $[\text{Pt}_3(\mu\text{-Br})(\mu\text{-PPh}_2)_2(\text{PPh}_3)_3]\text{OH}$

**Table S-4.** Table of least-squares planes for  $[\text{Pt}_3(\mu\text{-Br})(\mu\text{-PPh}_2)_2(\text{PPh}_3)_3]\text{OH}$

**Table S-5.** Selected Interatomic Distances (Å) and Angles (°) for  $[\text{Pt}_3(\mu\text{-Br})(\mu\text{-PPh}_2)_2(\text{PPh}_3)_3]\text{OH}$

**Table S-6.** Comparison between selected bond distances (Å) and angles (°) in the clusters  $[\text{Pt}_3(\mu\text{-Cl})(\mu\text{-PPh}_2)_2(\text{PPh}_3)_3]\text{BF}_4$  (**4**·BF<sub>4</sub>) and  $[\text{Pt}_3(\mu\text{-Br})(\mu\text{-PPh}_2)_2(\text{PPh}_3)_3]\text{OH}$

**Figure S1.** ORTEP of  $[\text{Pt}_3(\mu\text{-PPh}_2)_2\text{I}_2(\text{PPh}_3)_3]\cdot\text{PhCl}$  (**5**·PhCl) with complete numbering scheme (the PhCl solvent molecule is not shown).

**Figure S2.** <sup>31</sup>P{<sup>1</sup>H} NMR spectrum in CH<sub>2</sub>Cl<sub>2</sub> of the cluster cation  $[\text{Pt}_3(\mu_3\text{-AgOTf})(\mu\text{-OH})(\mu\text{-PPh}_2)_2(\text{PPh}_3)_3]^+$  **9** in **9**(BF<sub>4</sub>).

**Figure S3.** ORTEP of in  $[\text{Pt}_3(\mu_3\text{-AgBF}_4)(\mu\text{-PPh}_2)_2(\mu\text{-I})(\text{PPh}_3)_3]\text{BF}_4$  (**11**(BF<sub>4</sub>)) with complete numbering scheme.

**Table S-1.** Summary of Crystal Data and Intensity Collection of [Pt<sub>3</sub>(μ<sub>2</sub>-Cl)(μ-PPh<sub>2</sub>)<sub>2</sub>(PPh<sub>3</sub>)<sub>3</sub>]PF<sub>6</sub> (4(PF<sub>6</sub>))

|                                                                              |                                                                                 |
|------------------------------------------------------------------------------|---------------------------------------------------------------------------------|
| Formula                                                                      | C <sub>78</sub> H <sub>65</sub> ClF <sub>6</sub> P <sub>6</sub> Pt <sub>3</sub> |
| fw                                                                           | 1922.41                                                                         |
| crystal syst                                                                 | Monoclinic                                                                      |
| space group                                                                  | <i>P</i> 2 <sub>1</sub> / <i>c</i>                                              |
| cryst. dimens, mm                                                            | 0.1 x 0.1 x 0.13                                                                |
| <i>a</i> , Å                                                                 | 15.185(1)                                                                       |
| <i>b</i> , Å                                                                 | 16.940(3)                                                                       |
| <i>c</i> , Å                                                                 | 27.518(3)                                                                       |
| β                                                                            | □□□□□(□)                                                                        |
| <i>V</i> , Å <sup>3</sup>                                                    | 7067.6                                                                          |
| <i>Z</i>                                                                     | 4                                                                               |
| ρ, g/cm <sup>3</sup>                                                         | 1.79                                                                            |
| <i>F</i> (000), e                                                            | 3843.57                                                                         |
| Temp, °C                                                                     | 20                                                                              |
| diffractometer                                                               | Enraf Nonius CAD4 4F                                                            |
| radiation (graphite monochromator)                                           | Mo Kα <sub>1</sub> (λ = 0.70930 Å)                                              |
| linear absorption coeff, cm <sup>-1</sup>                                    | 64.2                                                                            |
| scan width, deg                                                              | 1 + 0.35 tg□                                                                    |
| step width, deg                                                              | 0.04                                                                            |
| scan θ/scan ω                                                                | 2                                                                               |
| scan speed deg/s                                                             | 0.083                                                                           |
| sinθ/λ <sub>max</sub> Å <sup>-1</sup>                                        | 0.66188                                                                         |
| 2θ limits deg                                                                | 1 28                                                                            |
| octants collected                                                            | ±h +k +l                                                                        |
| no of data collected                                                         | 14309                                                                           |
| no of unique data used                                                       | 5804 ( <i>I</i> > 2σ( <i>I</i> ))                                               |
| $R = \frac{\sum   F_o  -  F_e  }{\sum  F_o }$                                | 0.0621                                                                          |
| $R_w = \left[ \frac{\sum w ( F_o  -  F_e )^2}{\sum w  F_o ^2} \right]^{1/2}$ | 0.0733                                                                          |
| Sdt error in an observn of unit wt, e                                        | 1.4                                                                             |
| largest shift/esd, final cycle                                               | 3.0                                                                             |
| largest peak in final diff map, e/Å <sup>3</sup>                             | 1.1                                                                             |

**Table S-2.** Table of least-squares planes in  $[\text{Pt}_3(\mu_2\text{-Cl})(\mu\text{-PPh}_2)_2(\text{PPh}_3)_3]\text{PF}_6$  (**4**( $\text{PF}_6$ ))

Table of least-squares planes the equation of the plane is of the form :

$Ax + By + Cz - D = 0$  where A, B, C and D are constants and x, y, z are orthogonalized coordinates.

Plane n°1 : Pt1, Pt2, Pt3

0.0837    -0.9935            -0.0769            +12.2348

Others atoms

C11    0.226(9)            P1    -0.173(5)            P2    -0.138(5)

P3    -0.412(6)            P4    0.095(5)            P5    -0.168(5)

Plane n°2 : Pt1, Pt3, C11

0.0488    -0.9808            -0.1889            +12.9148

Plane n°3 : Pt1, Pt2, P4

0.0444    -0.9984            -0.0363            +12.3583

Plane n°4 : Pt2, Pt3, P5

-0.0125    -0.9951            -0.0977            +12.8030

Dihedral angles between planes

1 - 2            6.76(42)

1 - 4            5.64(16)

1 - 3            3.25(33)

**Table S-3.** Summary of Crystal Data and Intensity Collection of [Pt<sub>3</sub>(μ-Br)(μ-PPh<sub>2</sub>)<sub>2</sub>(PPh<sub>3</sub>)<sub>3</sub>]OH

|                                                          |                                                                   |
|----------------------------------------------------------|-------------------------------------------------------------------|
| Formula                                                  | C <sub>78</sub> H <sub>66</sub> BrOP <sub>5</sub> Pt <sub>3</sub> |
| fw                                                       | 1838.9                                                            |
| crystal syst                                             | Monoclinic                                                        |
| space group                                              | <i>P</i> 2 <sub>1</sub> / <i>c</i>                                |
| cryst. dimens, mm                                        | 0.1 x 0.08 x 0.11                                                 |
| <i>a</i> , Å                                             | 15.206(1)                                                         |
| <i>b</i> , Å                                             | 16.924(8)                                                         |
| <i>c</i> , Å                                             | 27.553(2)                                                         |
| β                                                        | 92.825(7)                                                         |
| <i>V</i> , Å <sup>3</sup>                                | 7082.1                                                            |
| <i>Z</i>                                                 | 4                                                                 |
| ρ, g/cm <sup>3</sup>                                     | 1.725                                                             |
| <i>F</i> (000), e                                        | 3546                                                              |
| Temp, °C                                                 | 20                                                                |
| diffractometer                                           | Enraf Nonius CAD4 4F                                              |
| radiation (graphite monochromator)                       | Mo Kα <sub>1</sub> (λ = 0.70930 Å)                                |
| linear absorption coeff, cm <sup>-1</sup>                | 69.74                                                             |
| scan width, deg                                          | 1 + 0.35 tgθ                                                      |
| step width, deg                                          | 0.04                                                              |
| scan θ/scan ω                                            | 2                                                                 |
| scan speed deg/s                                         | 0.083                                                             |
| sinθ/λmax Å <sup>-1</sup>                                | 0.59582                                                           |
| 2θ limits deg                                            | 1 25                                                              |
| octants collected                                        | +h +k ±l                                                          |
| no of data collected                                     | 10025                                                             |
| no of unique data used                                   | 6864 ( <i>I</i> < 6σ( <i>I</i> ))                                 |
| $R = \sum \ F_o\  -  F_o  / \sum  F_o $                  | 0.0499                                                            |
| $Rw = [\sum w ( F_o  -  F_e )^2 / \sum w  F_o ^2]^{1/2}$ | 0.0455                                                            |
| Sdt error in an observn of unit wt, e                    | 1.2                                                               |
| largest shift/esd, final cycle                           | 3.8 (Y C(64))                                                     |
| largest peak in final diff map, e/Å <sup>3</sup>         | 1.5                                                               |

**Table S-4.** Table of least-squares planes for  $[\text{Pt}_3(\mu\text{-Br})(\mu\text{-PPh}_2)_2(\text{PPh}_3)_3]\text{OH}$ 

The equation of the planes is of the form :

$Ax + By + Cz - D = 0$  where A, B, C and D are constants and x, y, z are orthogonalized coordinates.

Plane n°1 Pt1, Pt2, Pt3

-1.2105            16.8076 -2.2578            -3.3143

Others atoms

Br            0.240(2)            P1            -0.197(4)    P2            -0.135(4)

P3            -0.413(4)            P4            0.070(4)    P5            -0.178(4)

Plane n°2 Pt1, Pt3, Br

0.6813            16.5764 -5.3513            -2.9454

Plane n°3 Pt1, Pt2, P4

0.7766            16.8756 -1.4702            -3.7243

Plane n°4 Pt2, Pt3, P5

0.3529            16.8191 -3.0269            -4.2941

Dihedral angles between planes :

1 - 2            6.70

1 - 4            5.04

1 - 3            2.38

**Table S-5.** Selected Interatomic Distances and Angles for [Pt<sub>3</sub>(μ-Br)(μ-PPh<sub>2</sub>)<sub>2</sub>(PPh<sub>3</sub>)<sub>3</sub>]OH

---

| Bond lengths  |           |               |           |
|---------------|-----------|---------------|-----------|
| Pt(1) - Pt(2) | 2.9180(7) | Pt(1) - Pt(3) | 2.8813(7) |
| Pt(2) - Pt(3) | 2.9207(8) | Pt(1) - Br    | 2.508(2)  |
| Pt(3) - Br    | 2.515(2)  | Pt(1) - P(1)  | 2.246(4)  |
| Pt(1) - P(4)  | 2.208(4)  | Pt(2) - P(4)  | 2.258(4)  |
| Pt(2) - P(2)  | 2.271(4)  | Pt(2) - P(5)  | 2.277(3)  |
| Pt(3) - P(5)  | 2.202(3)  | Pt(3) - P(3)  | 2.242(4)  |

  

| Bond Angles (deg)     |           |                       |           |
|-----------------------|-----------|-----------------------|-----------|
| Pt(2) - Pt(1) - Pt(3) | 60.48(2)  | Pt(1) - Pt(2) - Pt(3) | 59.14(2)  |
| Pt(1) - Pt(3) - Pt(2) | 60.38(1)  | Pt(1) - Cl(1) - Pt(3) | 70.01(5)  |
| Pt(1) - P(4) - Pt(2)  | 81.6(1)   | Pt(2) - P(5) - Pt(3)  | 81.4(1)   |
| Pt(1) - Pt(3) - Br    | 54.89(3)  | Pt(3) - Pt(1) - Br    | 55.10(4)  |
| Pt(1) - Pt(2) - P(4)  | 48.45(9)  | Pt(2) - Pt(1) - P(4)  | 50.0(1)   |
| Pt(2) - Pt(3) - P(5)  | 50.44(9)  | Pt(3) - Pt(2) - P(5)  | 48.19(9)  |
| Br - Pt(1) - P(1)     | 91.2(1)   | P(4) - Pt(1) - P(1)   | 104.1(1)  |
| Br - Pt(3) - P(3)     | 91.2(1)   | P(5) - Pt(3) - P(3)   | 103.3(1)  |
| P(4) - Pt(2) - P(2)   | 105.7(1)  | P(5) - Pt(2) - P(2)   | 98.5(1)   |
| Pt(3) - Pt(1) - P(1)  | 145.3(1)  | Pt(2) - Pt(1) - P(1)  | 153.5(1)  |
| Pt(1) - Pt(2) - P(2)  | 153.86(9) | Pt(3) - Pt(2) - P(2)  | 146.64(9) |
| Pt(1) - Pt(3) - P(3)  | 143.5(1)  | Pt(2) - Pt(3) - P(3)  | 152.7(1)  |
| Br - Pt(1) - P(4)     | 163.6(1)  | P(4) - Pt(2) - P(5)   | 155.5(1)  |
| P5 - Pt(3) - Br       | 165.41(9) |                       |           |

---

**Table S-6.** Comparison between selected bond distances (Å) and angles (°) in the clusters [Pt<sub>3</sub>(μ-Cl)(μ-PPh<sub>2</sub>)<sub>2</sub>(PPh<sub>3</sub>)<sub>3</sub>]BF<sub>4</sub> (**4**·BF<sub>4</sub>) and [Pt<sub>3</sub>(μ-Br)(μ-PPh<sub>2</sub>)<sub>2</sub>(PPh<sub>3</sub>)<sub>3</sub>]OH

|                       | <b>4</b> ·BF <sub>4</sub> | [Pt <sub>3</sub> (μ-Br)(μ-PPh <sub>2</sub> ) <sub>2</sub> (PPh <sub>3</sub> ) <sub>3</sub> ]OH |
|-----------------------|---------------------------|------------------------------------------------------------------------------------------------|
| Pt(1) – Pt(2)         | 2.904(1)                  | 2.9180(7)                                                                                      |
| Pt(1) – Pt(3)         | 2.825(1)                  | 2.8813(7)                                                                                      |
| Pt(2) – Pt(3)         | 2.901(1)                  | 2.9207(8)                                                                                      |
| Pt(1) – X             | 2.366(8)                  | 2.508(2)                                                                                       |
| Pt(3) – X             | 2.364(8)                  | 2.515(2)                                                                                       |
| Pt(1) – P(1)          | 2.254(5)                  | 2.246(4)                                                                                       |
| Pt(1) – P(4)          | 2.184(6)                  | 2.208(4)                                                                                       |
| Pt(2) – P(4)          | 2.260(5)                  | 2.258(4)                                                                                       |
| Pt(2) – P(2)          | 2.255(6)                  | 2.271(4)                                                                                       |
| Pt(2) – P(5)          | 2.288(5)                  | 2.277(3)                                                                                       |
| Pt(3) – P(5)          | 2.194(5)                  | 2.202(3)                                                                                       |
| Pt(3) – P(3)          | 2.230(6)                  | 2.242(4)                                                                                       |
| Pt(2) – Pt(1) – Pt(3) | 60.8(0)                   | 60.48(2)                                                                                       |
| Pt(1) – Pt(2) – Pt(3) | 58.2(0)                   | 59.14(2)                                                                                       |
| Pt(1) – Pt(3) – Pt(2) | 60.9(0)                   | 60.38(1)                                                                                       |
| Pt(1) – X – Pt(3)     | 72.8(2)                   | 70.01(5)                                                                                       |
| Pt(1) – P(4) – Pt(2)  | 81.6(2)                   | 81.6(1)                                                                                        |
| Pt(2) – P(5) – Pt(3)  | 80.7(2)                   | 81.4(1)                                                                                        |
| Pt(1) – Pt(3) – X     | 53.1(2)                   | 54.89(3)                                                                                       |
| Pt(3) – Pt(1) – X     | 54.0(1)                   | 55.10(4)                                                                                       |
| Pt(1) – Pt(2) – P(4)  | 48.1(1)                   | 48.45(9)                                                                                       |
| Pt(2) – Pt(1) – P(4)  | 50.3(1)                   | 50.0(1)                                                                                        |
| Pt(2) – Pt(3) – P(5)  | 51.1(1)                   | 50.44(9)                                                                                       |
| Pt(3) – Pt(2) – P(5)  | 48.3(1)                   | 48.19(9)                                                                                       |
| X – Pt(1) – P(1)      | 90.4(2)                   | 91.2(1)                                                                                        |
| P(4) – Pt(1) – P(1)   | 105.2(2)                  | 104.1(1)                                                                                       |
| X – Pt(3) – P(3)      | 91.4(2)                   | 91.2(1)                                                                                        |
| P(5) – Pt(3) – P(3)   | 103.6(2)                  | 103.3(1)                                                                                       |

---

|                      |          |           |
|----------------------|----------|-----------|
| P(4) – Pt(2) – P(2)  | 106.8(2) | 105.7(1)  |
| P(5) – Pt(2) – P(2)  | 98.6(2)  | 98.5(1)   |
| Pt(3) – Pt(1) – P(1) | 143.6(2) | 145.3(1)  |
| Pt(2) – Pt(1) – P(1) | 155.0(2) | 153.5(1)  |
| Pt(1) – Pt(2) – P(2) | 154.5(1) | 153.86(9) |
| Pt(3) – Pt(2) – P(2) | 146.9(1) | 146.64(9) |
| Pt(1) – Pt(3) – P(3) | 142.1(2) | 143.5(1)  |
| Pt(2) – Pt(3) – P(3) | 153.6(2) | 152.7(1)  |
| X – Pt(1) – P(4)     | 163.0(2) | 163.6(1)  |
| P(4) – Pt(2) – P(5)  | 154.4(2) | 155.5(1)  |
| P(5) – Pt(3) – X     | 163.8(2) | 165.41(9) |

---



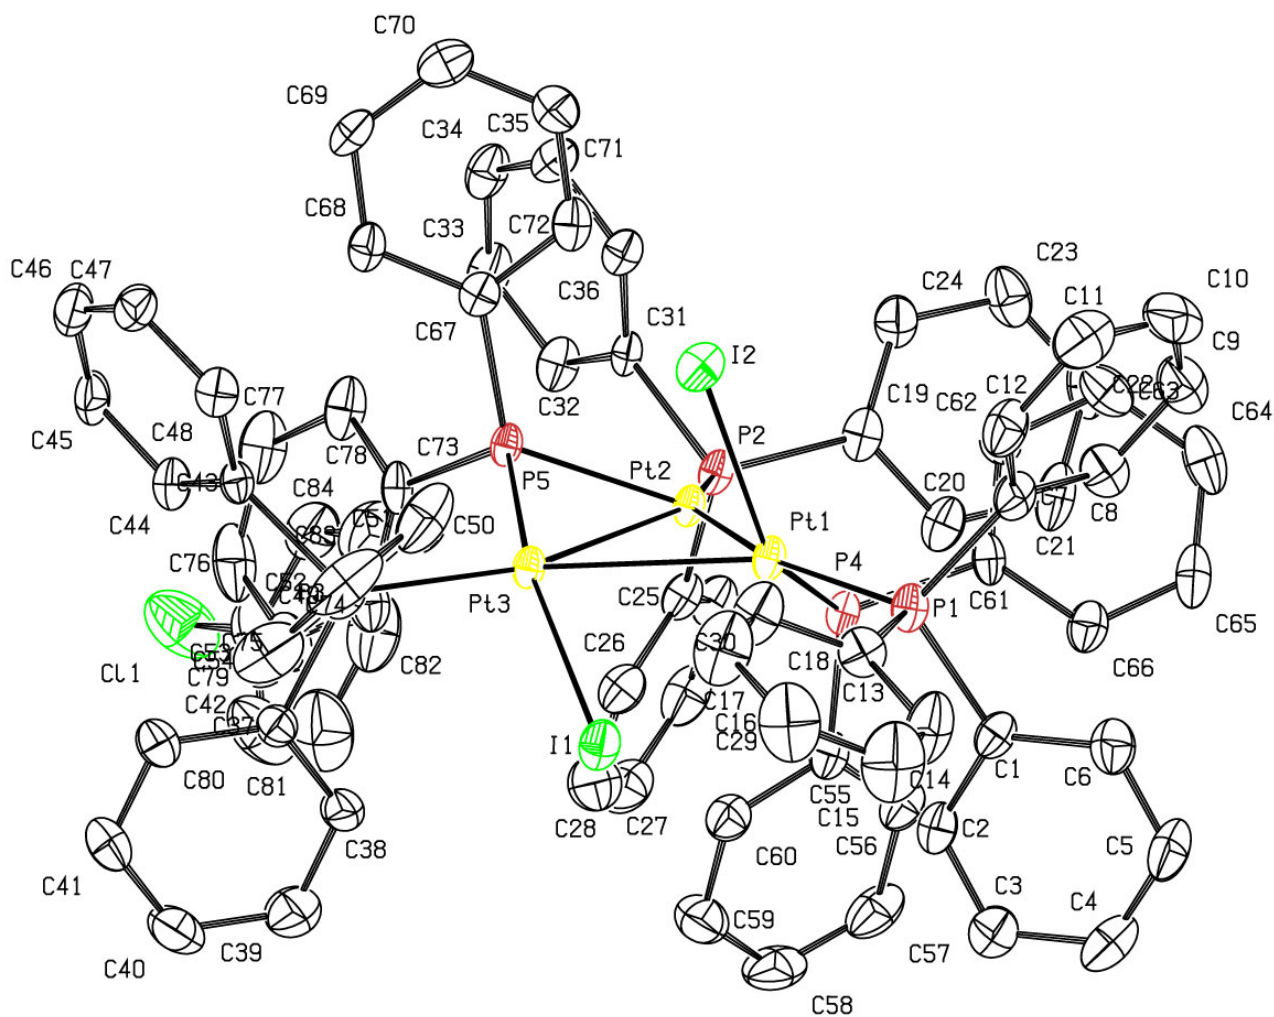

**Figure S1.** ORTEP view of [Pt<sub>3</sub>(μ-PPh<sub>2</sub>)<sub>2</sub>I<sub>2</sub>(PPh<sub>3</sub>)<sub>3</sub>]·PhCl (**5**·PhCl) with complete numbering scheme (the PhCl solvent molecule is not shown).

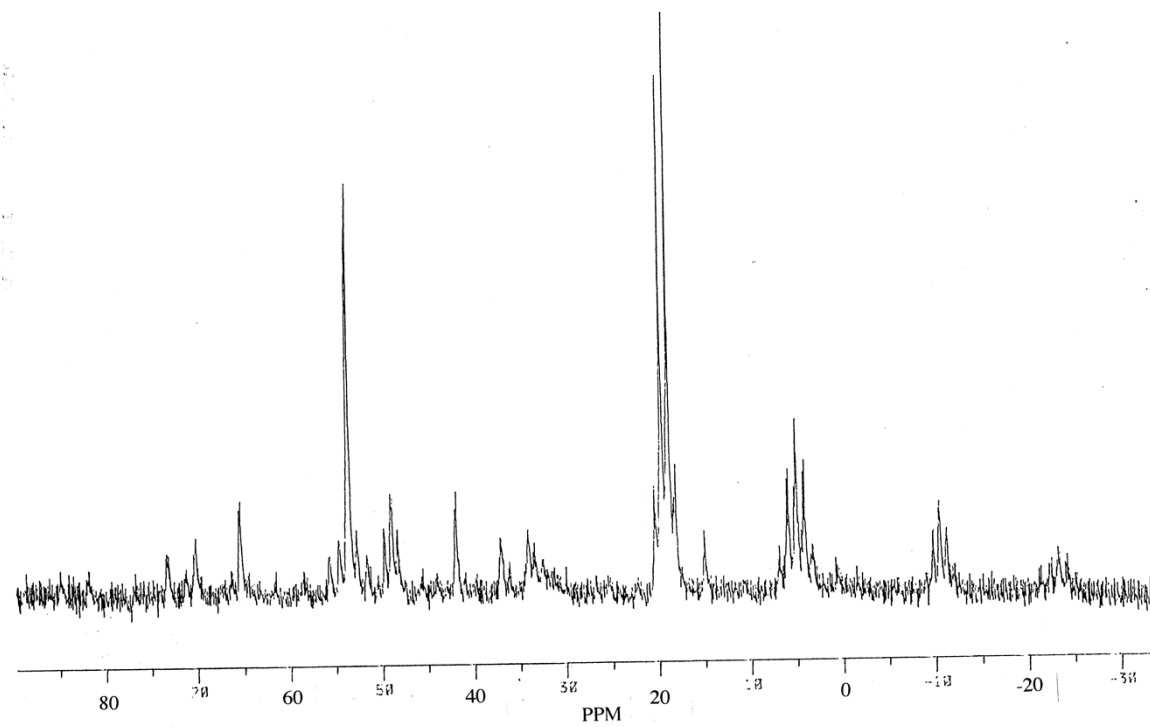

**Figure S2.**  $^{31}\text{P}\{^1\text{H}\}$  NMR spectrum in  $\text{CH}_2\text{Cl}_2$  of the cluster cation  $[\text{Pt}_3(\mu_3\text{-AgOTf})(\mu\text{-OH})(\mu\text{-PPh}_2)_2(\text{PPh}_3)_3]^+$  (**9**) in **9**( $\text{BF}_4$ ).

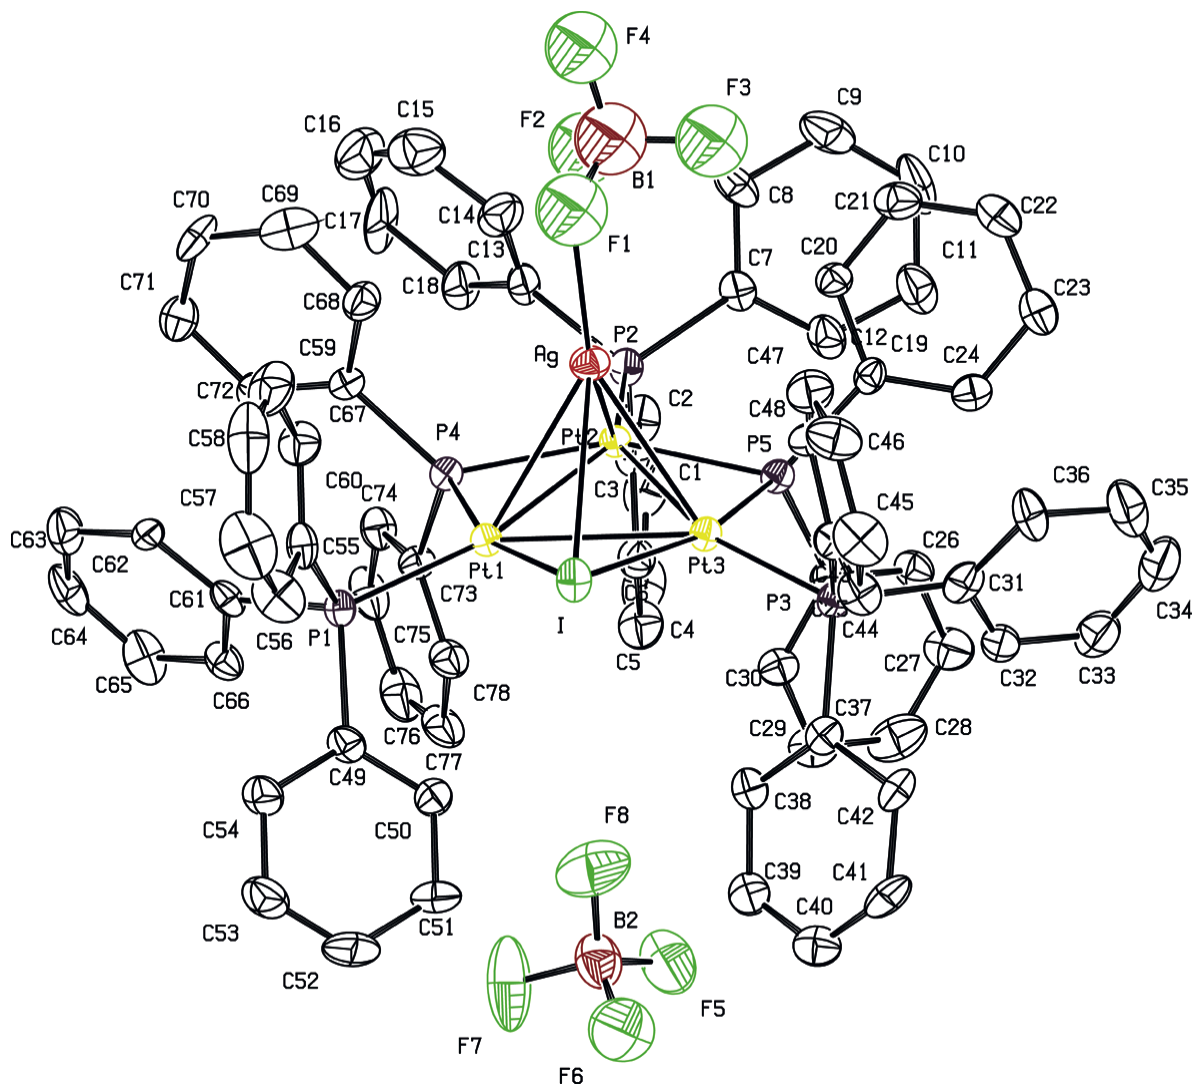

**Figure S3.** ORTEP view of  $[\text{Pt}_3(\mu_3\text{-AgBF}_4)(\mu\text{-PPh}_2)_2(\mu\text{-I})(\text{PPh}_3)_3]\text{BF}_4$  (**11**( $\text{BF}_4$ )) with complete numbering scheme. Hydrogen atoms have been omitted for clarity.
